# Supplementary material
Source: publisher figshare collection journal article supplement (https://acs.figshare.com/ndownloader/files/27413677)
Supplement: Supplementary file 1 [file 27413677]

## Supporting Information

### **Three-Dimensional Network Pd-Ni/ $\gamma$ -Al<sub>2</sub>O<sub>3</sub> Catalysts for Highly Active Catalytic Hydrogenation of Nitrobenzene to Aniline under Mild Conditions**

Yang Jiang<sup>1#</sup>, Qian Li<sup>1#</sup>, Xi Li<sup>1</sup>, Xinyi Wang<sup>1</sup>, Sen Dong<sup>2,3</sup>, Jianhua Li<sup>2,3</sup>, Li Hou<sup>1\*</sup>, Tifeng Jiao<sup>1\*</sup>, Yatao Wang<sup>2,3</sup> and Faming Gao<sup>1</sup>

<sup>1</sup>Hebei Key Laboratory of Applied Chemistry, School of Environmental and Chemical Engineering, 438 West Hebei Street, Yanshan University, Qinhuangdao 066004, China

<sup>2</sup>Coal Chemical R&D Center of Kailuan Group, Tangshan 063611, China

<sup>3</sup>Hebei Provincial Technology Innovation Centre of Coal-based Materials and Chemicals, Tangshan 063018, China

\*Corresponding authors.

*E-mail address:* holy@ysu.edu.cn (L. Hou); tfjiao@ysu.edu.cn (T. Jiao);

<sup>#</sup>These authors contributed equally to this work.

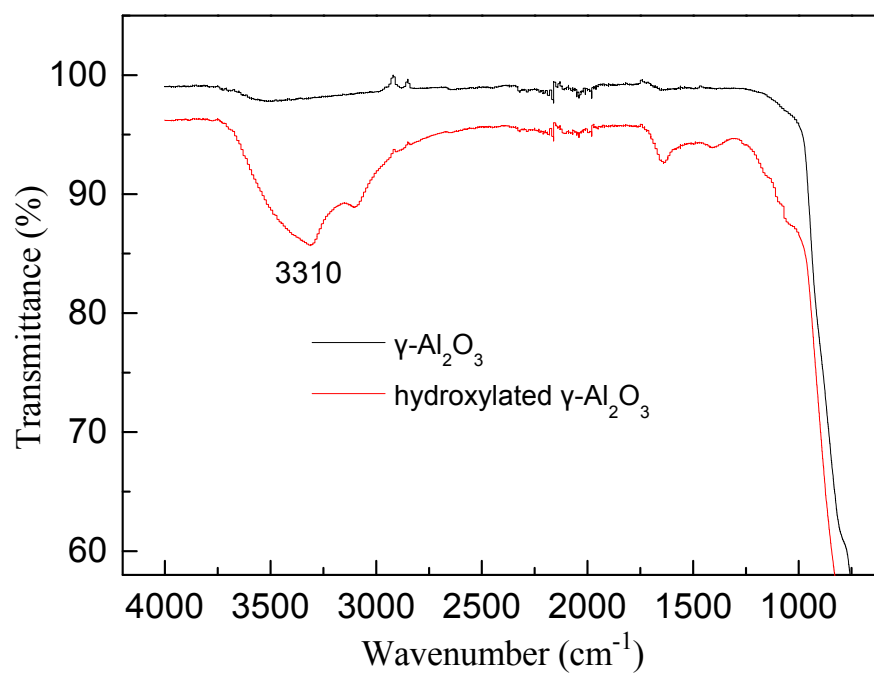

**Figure S1.** FTIR spectra of the hydroxylated  $\gamma\text{-Al}_2\text{O}_3$  and  $\gamma\text{-Al}_2\text{O}_3$

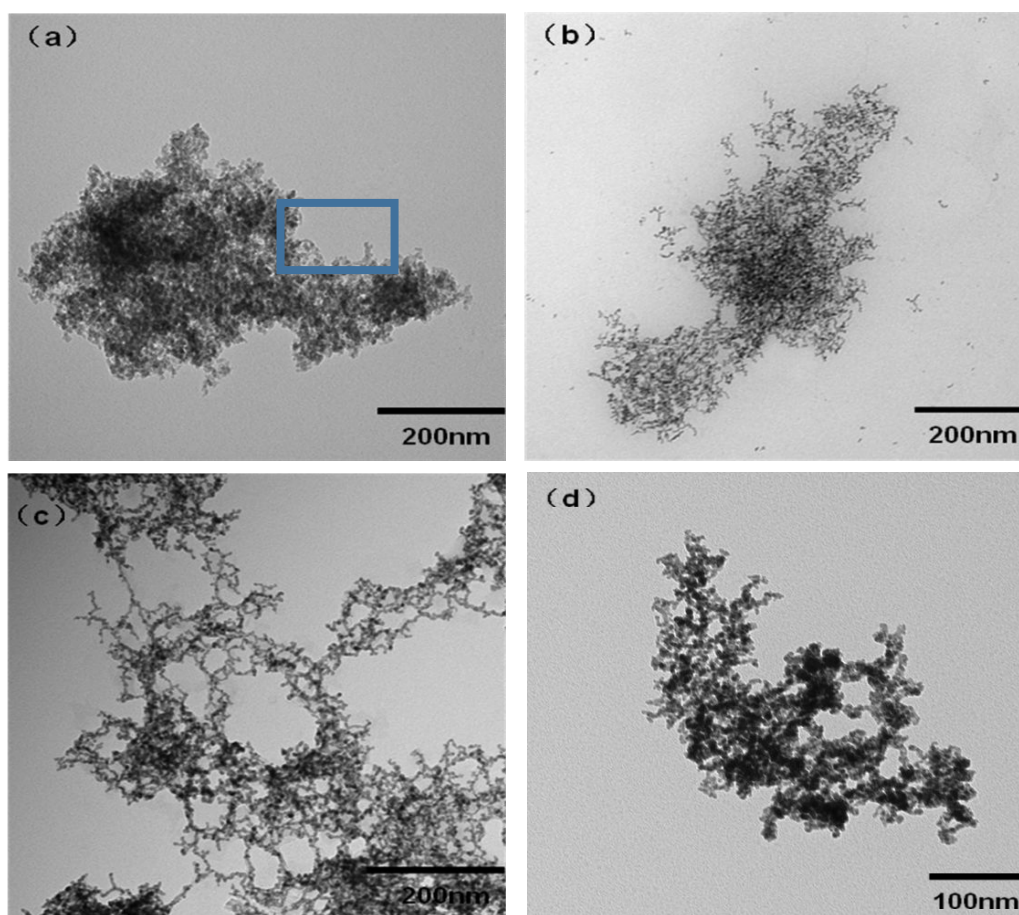

**Figure S2.** TEM images of Pd-Ni catalysts obtained with different precursor salt amount: (a) 0.2 mmol, (b) 0.4 mmol, (c) 0.6 mmol, (d) 1.0 mmol.

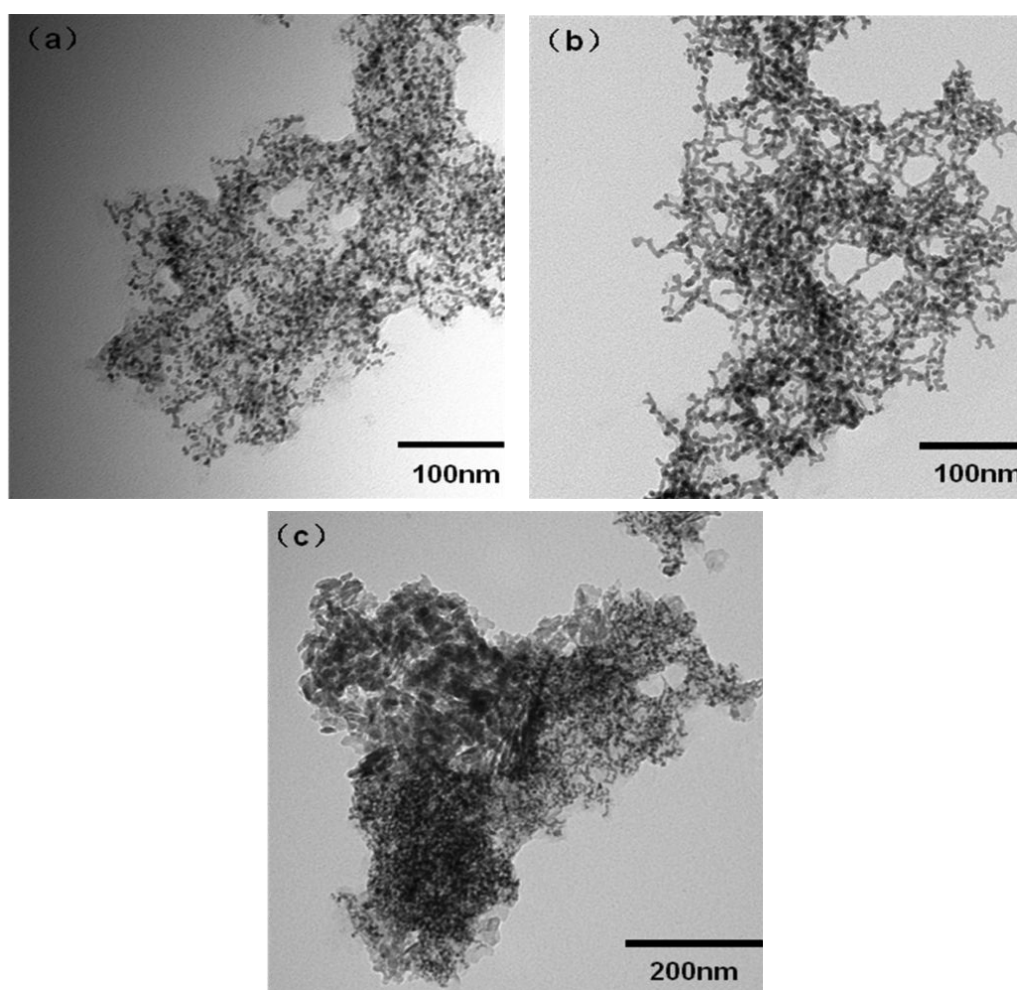

**Figure S3.** TEM images of Pd-Ni catalysts obtained with different reducing agent concentration:  
(a) 1.5 mg/mL, (b) 2 mg/mL, (c) 2.5 mg/mL.

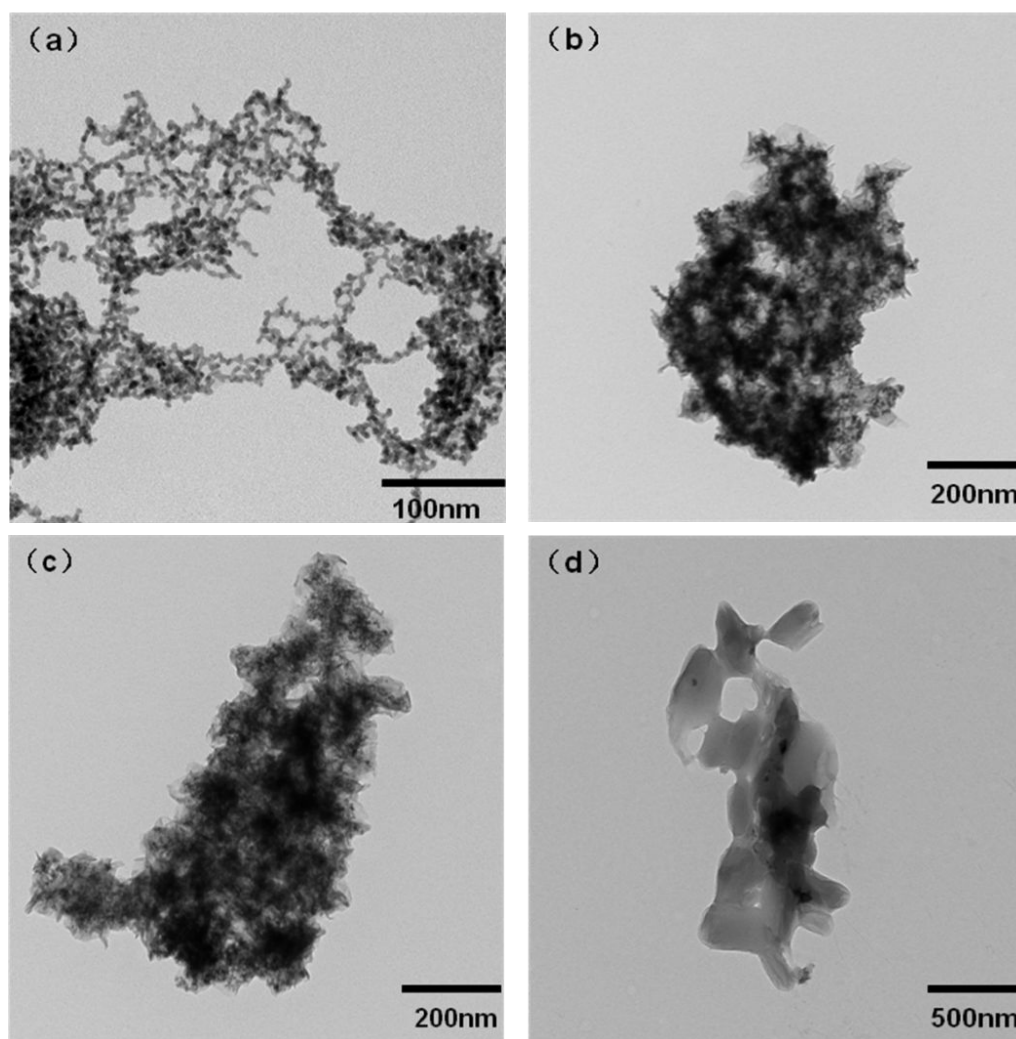

**Figure S4.** TEM images of Pd-Ni catalysts obtained with different stabilizer concentration: (a) 0.5 wt%, (b) 1 wt%, (c) 2 wt%, (d) 3 wt%.

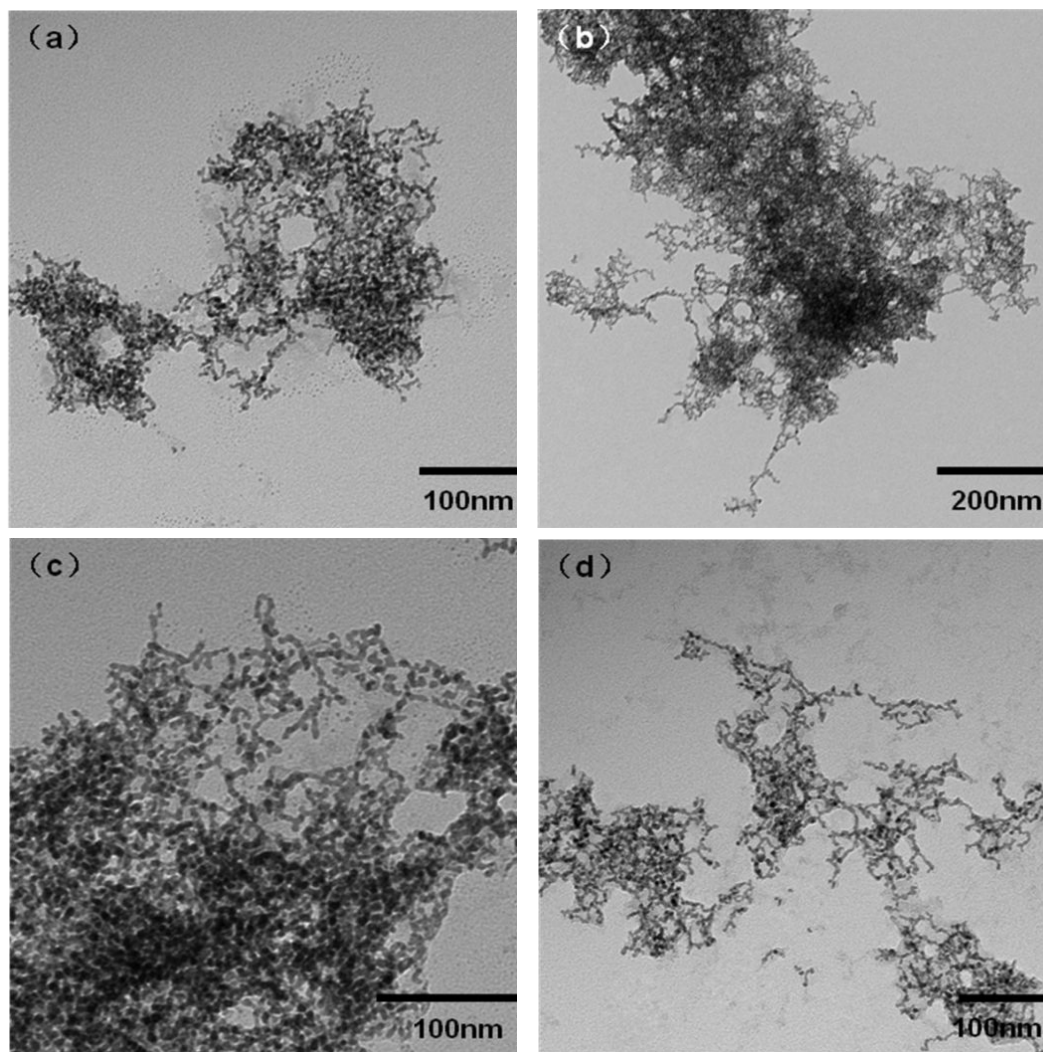

**Figure S5.** TEM images of Pd-Ni catalysts obtained with different reducing stirring time: (a) 30s, (b) 1min, (c) 3 min, (d) 5 min.
